# Supplementary material for: A modified FASP protocol for high-throughput preparation of protein samples for mass spectrometry
Source: PubMed Central journal article supplement (PMC5531558; doi:10.1371/journal.pone.0175967), 2017-07-27

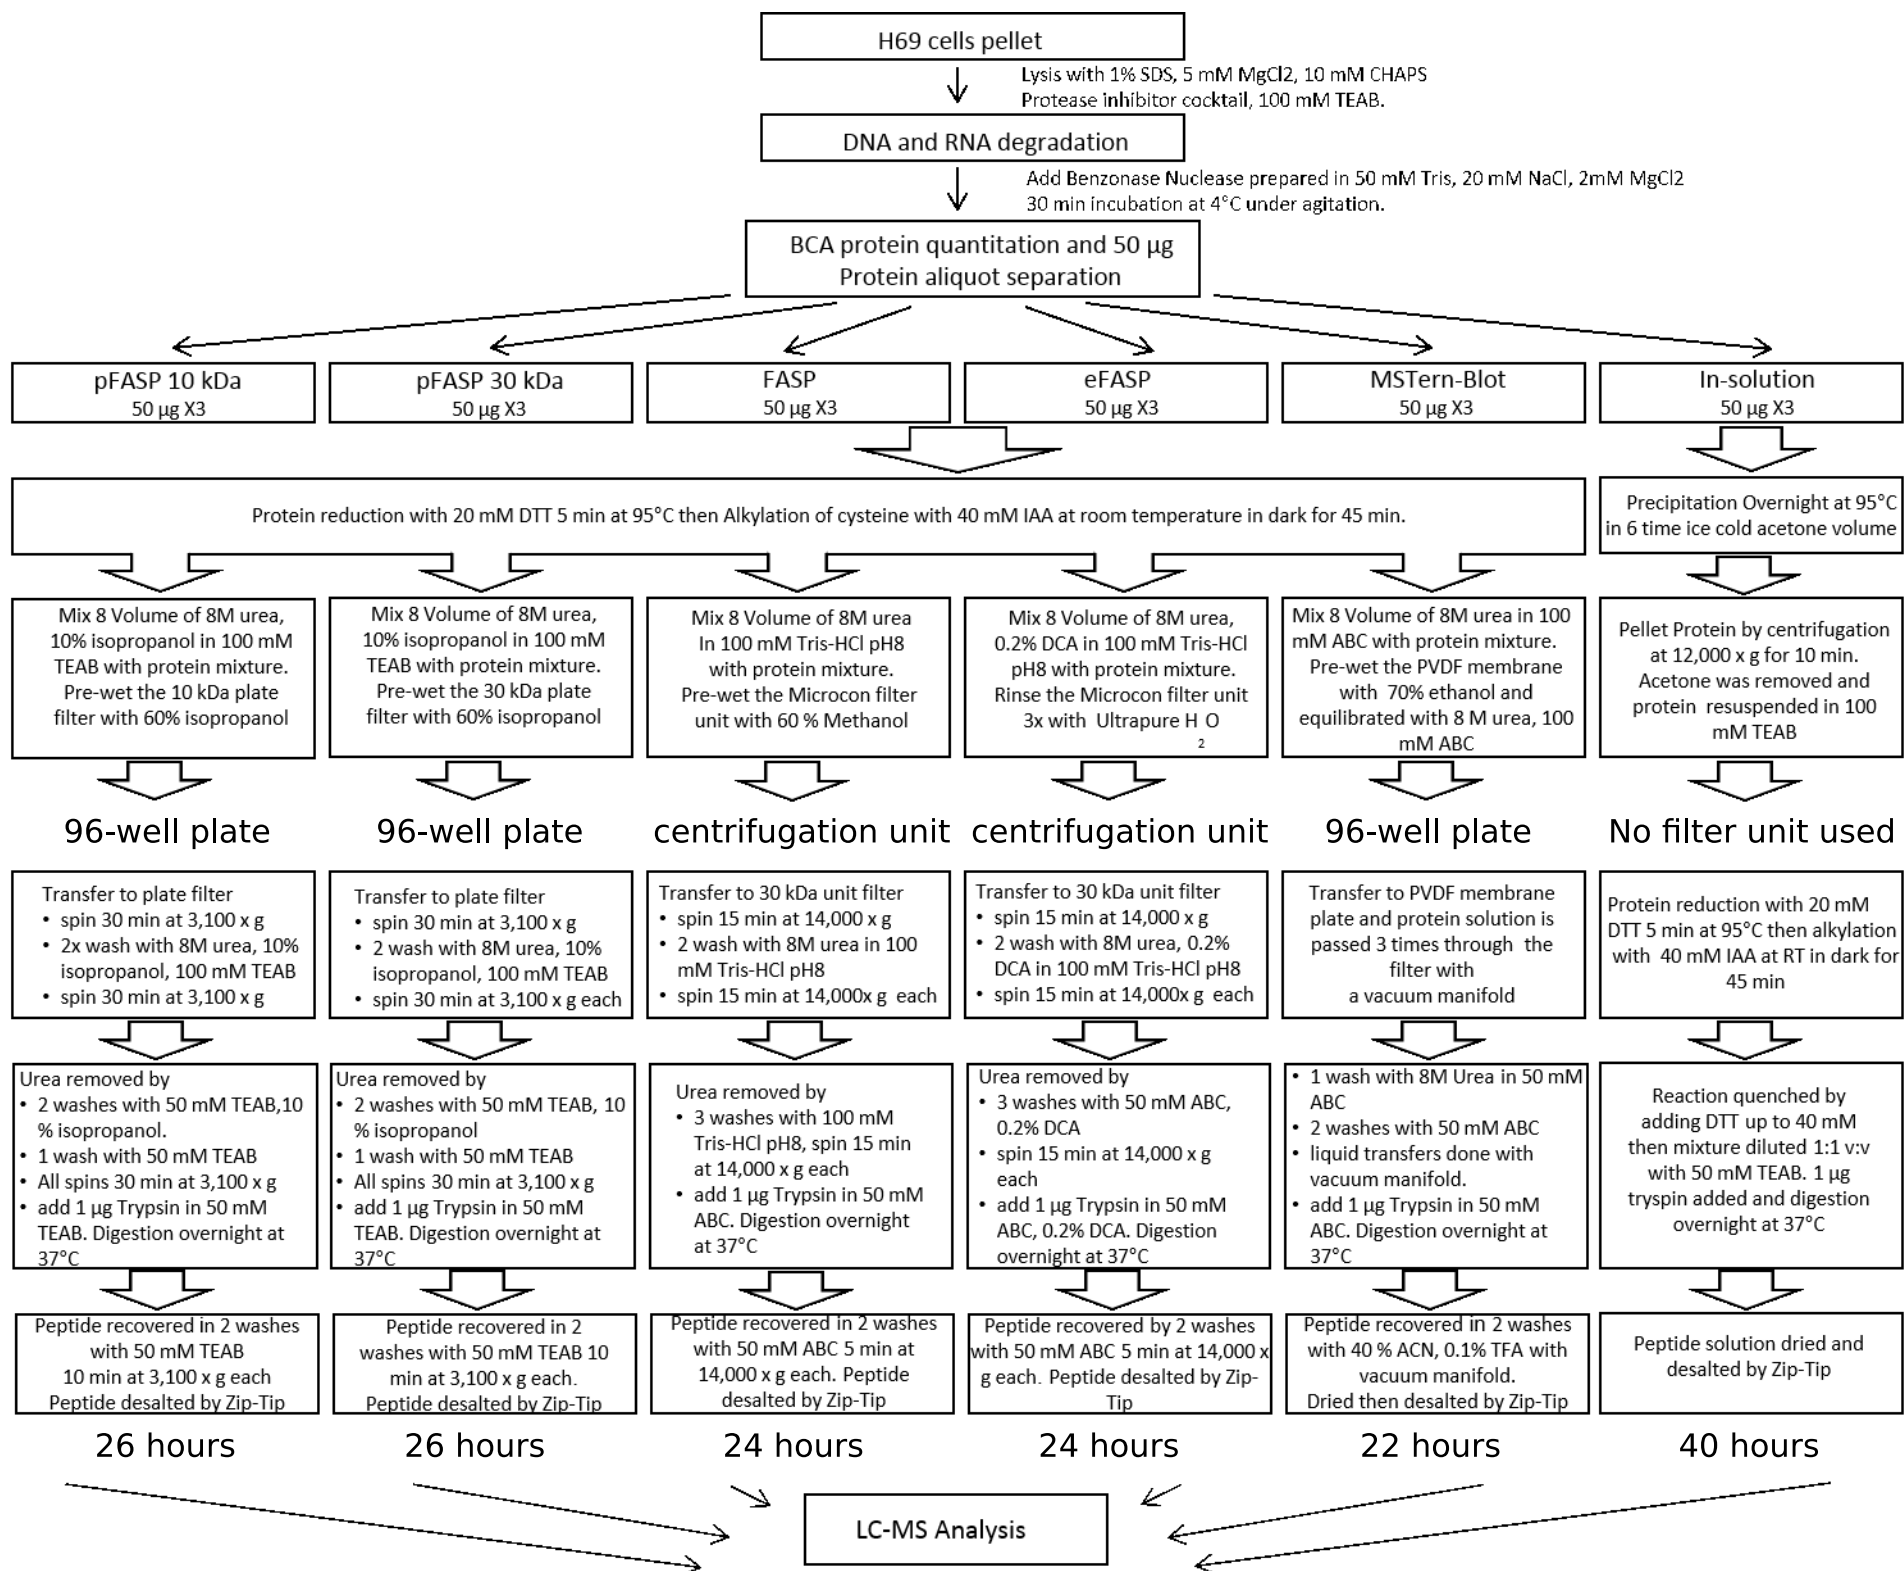

Supplement: pone.0175967.s001.pdf [file pone.0175967.s001.pdf]
